# Supplementary material
Source: PubMed Central journal article supplement (PMC4782053)

**AAV2-1**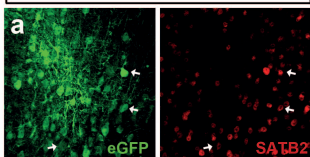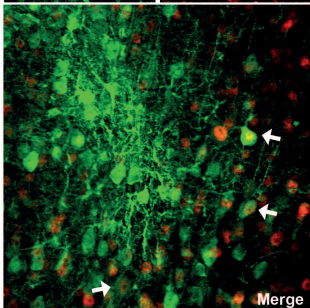**AAV2-2**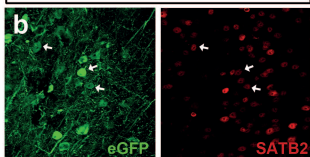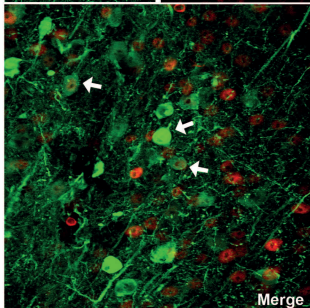**AAV2-5**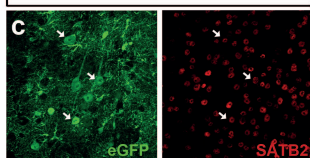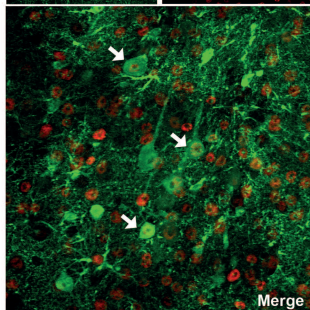**AAV2-8**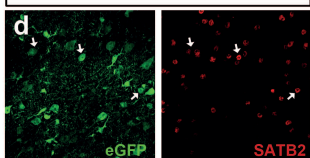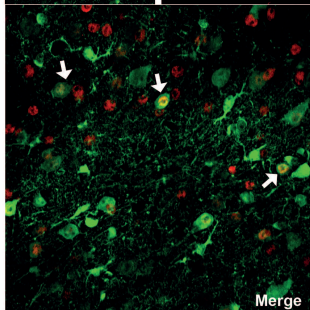**AAV2-9**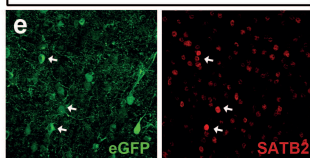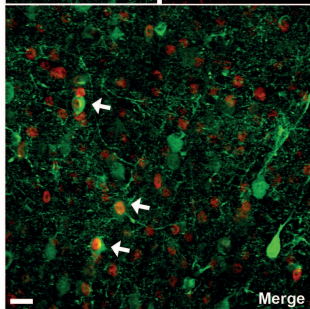**f****CPN transduction**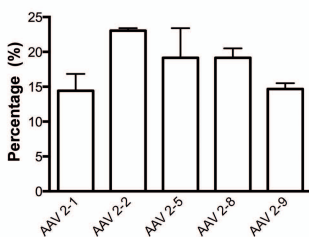

Supplement: gt2015112x2.pdf [file gt2015112x2.pdf]
